# Supplementary material
Source: Springer Nature journal article supplement (https://www.springermedizin.de/resource/supplementary/12891_2013_1869_MOESM1_ESM.pdf/9508646)

**a**

number of P0 cells/1000 BM-MNCs

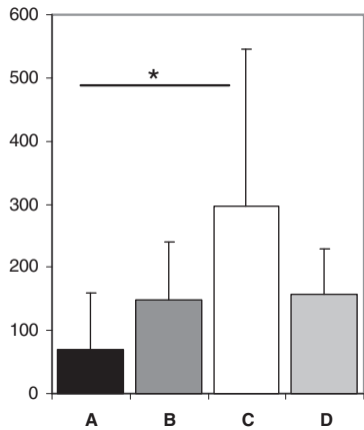**b**

Proliferation index P1

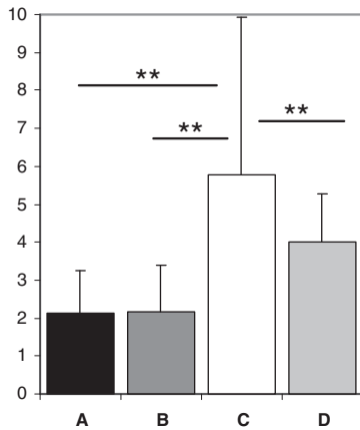**c**

P2 cell count/1000 BM-MNCs

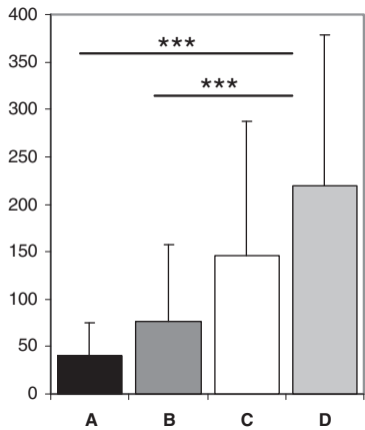

Supplement: MOESM1 [file 9508646]
